# Supplementary material
Source: PubMed Central journal article supplement (PMC4249271)
Supplement: IAI.01850-14_zii999090956so1.pdf [file IAI.01850-14_zii999090956so1.pdf]

1 Table S1. Oligonucleotides used in this study.

| Name                                                   | Sequence (5' – 3') <sup>a</sup>                                     | Product size; position or optimal melting temperature                    |
|--------------------------------------------------------|---------------------------------------------------------------------|--------------------------------------------------------------------------|
| <b>Construction of mutant and complemented strains</b> |                                                                     |                                                                          |
| ermE1-ascl<br>ermE2-xhoI                               | TTGGCGCGCCTGGCGGAAACGTAAAAGAAG<br>TTCTCGAGGGGCTCCTTGAAGCTGTCAGT     | 998 bp, amplicon containing the <i>erm<sup>f</sup></i> gene from pVA838. |
| vicKP1<br>vicKP2-ascl                                  | CTGCTAAGGACAGTGAGTTTGA<br>TTGGCGCGCCAATAACAGCAAGGCAACAACATA         | 564 bp, 459 bp upstream to 95 bp downstream of <i>vicK</i> ORF.          |
| vicKP3-xhoI<br>vicKP4                                  | TTCTCGAGGCTTTATCTGGGCTAAGAGTGA<br>AGCCAATACACCAACACCAT              | 349 bp, 1237 bp upstream to 228 bp downstream of <i>vicK</i> ORF.        |
| C1- <i>eco</i> RI<br>C2- <i>sa</i> cl                  | TTGAATTCGTTGATTGTACGGATAAGAGT<br>TTGAGCTCATGTTACCTTAACATAAGATTGG    | 506 bp; 490 bp upstream to 24 bp downstream of <i>vicK</i> ORF.          |
| C3 - <i>sa</i> cl<br>C4 - <i>ba</i> mHI                | TTGAGCTCATGATTGAAGCAATTAACAATTTG<br>TTGGATCCAGATAGAAACAGTTACCGCTTGA | 1437pb; amplicon containing <i>vicK</i> for mutant complementation       |
| vicRP1<br>vicRP2-ascl                                  | GCCTTCTAAAGCGTTGATTGT<br>TTGGCGCGCCATTGGTTTCTCATCATCTACAAC          | 549 bp, 501 bp upstream to 38 bp downstream of <i>vicR</i> ORF.          |
| vicRP3-xhoI<br>vicRP4                                  | TTCTCGAGTGGAACAGTATGGGGCTATG<br>GTCAGCTCAGGAACATTGGTAA              | 638 bp, 569 bp upstream to 477 bp downstream of <i>vicR</i> ORF.         |
| <b>Quantification of eDNA</b>                          |                                                                     |                                                                          |
| 16SRNArF                                               | CGTAAACGATGAGTGCTAGGTG                                              | 204 bp; 58°C                                                             |
| 16SRNArR                                               | TAGAGCGGTCAGAGGGATGT                                                |                                                                          |
| <b>qPCR</b>                                            |                                                                     |                                                                          |
| 16SrRNAF<br>16SrRNAR                                   | CGTAAACGATGAGTGCTAGGTG<br>TAGAGCGGTCAGAGGGATGT                      | 204 bp; 58°C                                                             |
| <i>ackAF</i><br><i>ackAR</i>                           | GCATCCGTGCTTTTAGAGAA<br>TACTTGCGGACCTTGTTTTTC                       | 142 bp; 60°C                                                             |
| <i>cgTF</i><br><i>cgTR</i>                             | TGGATAGAATGTGACGACGAT<br>AGCACTTGGACTGGAAGGTTA                      | 168 bp; 54°C                                                             |
| <i>ccpAF</i><br><i>ccpAR</i>                           | TATTTGGAATGACAACGCCTAC<br>AGTGAATGGAACAAGAACGTC                     | 143 bp; 60°C                                                             |
| <i>comEF</i><br><i>comER</i>                           | GGACAGCGATGATTTTCGTA<br>AGCTTCATAAACTTCGGATTG                       | 197 bp; 60°C                                                             |
| <i>cwdPF</i><br><i>cwdPR</i>                           | AGGGTTATGCAACAGGAAATG<br>CGGATTAAGTAGCCACGATAG                      | 176 bp; 54°C                                                             |

---

|                                    |                                                   |              |
|------------------------------------|---------------------------------------------------|--------------|
| <i>gtfPF</i><br><i>gtfPR</i>       | TCGTCTATCCTTGCTTTATTCG<br>ACGGTCTGCACTTCACTATCA   | 165 bp; 58°C |
| <i>Ssa0094F</i><br><i>Ssa0094R</i> | TGAGCCAACAACCTACAATGC<br>CTGGGCGGTAGAGACTAAATTC   | 155 bp; 58°C |
| <i>gbpBF</i><br><i>gbpBR</i>       | CAAGTCAACGAGATTCAAGGC<br>TTTGTGGGTACTGCGAGC       | 182 bp; 58°C |
| <i>Ssa1543F</i><br><i>Ssa1543R</i> | TCAAGAATACCTACCTGAAGCA<br>ATAGCCAAAGTGAAGGACATAAA | 153 bp; 54°C |
| <i>sodAF</i><br><i>sodAR</i>       | CTTTTCTGGGAATTGATGACAC<br>GGAGTATCCTGATTGCTGTTG   | 206 bp; 54°C |
| <i>spxBF</i><br><i>spxBR</i>       | AATGTGAAGAACAACCAAACTG<br>TCATGTGAAGGTGACGAGTAGA  | 178 bp; 54°C |
| <i>spxRF</i><br><i>spxRR</i>       | TTTTCGTCATGACCTTATCCA<br>CTGTGCGTGATTATCTGGACT    | 150 bp; 60°C |
| <i>sspCF</i><br><i>sspCR</i>       | CTACCAACCTCACCAGCAGA<br>TAGAGCAAAGTGAACGACGGA     | 186 bp; 60°C |
| <i>sspDF</i><br><i>sspDR</i>       | CCTGAAGTAAGTGCGGGAGAA<br>ATCTGGCTCCTCCATCAAAGG    | 183 bp; 60°C |
| <i>tpKF</i><br><i>tpKR</i>         | GGGAACATAGGTCAGCAGATT<br>GCTATCCAGATGCTTGCTGA     | 155 bp; 60°C |
| <i>vicRF</i><br><i>vicRR</i>       | ATAATCGGAACATTGCTGGTC<br>ATGAGGTTTTGACTGCTTTTGA   | 151 bp; 60°C |
| <i>vicKF</i><br><i>vicKR</i>       | TTCCTGAGCTGACGATTGA<br>GCTGACGTTGGAGACAAA         | 179 bp; 54°C |
| <i>vicXF</i><br><i>vicXR</i>       | GTATTGGCTCGCAAGTATCATC<br>GACACCAAAGCTCTCCACATC   | 159 bp; 54°C |

---

**EMSA**

|                        |                                                |                                                |
|------------------------|------------------------------------------------|------------------------------------------------|
| SSA_0094F<br>SSA_0094R | CAAGAGCTTAGGTCGAGTTTA<br>GCTCGTAATATCCGCTTTAAT | 379 bp; 241 bp upstream to 138 bp of gene ORF. |
| SSA_0019F<br>SSA_0019R | CTCGCTTTTTATCTGTTTTGA<br>GCAATCTTTTCATCAGTTGTC | 388 bp; 284 bp upstream to 103 bp of gene ORF  |
| SSA_0304F<br>SSA_0304R | AGATTCCTGTTTCTCTTCTGC<br>CTGGACAACATAAGAATCTGC | 395 bp; 293 bp upstream to 102 bp of gene ORF  |
| SSA_0391F<br>SSA_0391R | TCTTCGAAAGAACACAGCTC<br>CCTGATGGGATACCGTAGAT   | 398 bp; 309 bp upstream to 89 bp of gene ORF   |

|           |                      |                                               |
|-----------|----------------------|-----------------------------------------------|
| SSA_0613F | CTCTATGAACGGATGCTGAT | 316 bp; 258 bp upstream to 58 bp of gene ORF. |
| SSA_0613R | GGCTACCCAGTTCTTCTTAA |                                               |
| SSA_1324F | CTTTGTCCCATCCTTATCT  | 314 bp; 311 bp upstream to 3 bp of gene ORF.  |
| SSA_1324R | CATCTTTGCGGAAGTAGTCT |                                               |

---

1 <sup>a</sup> Underlined sequences indicate restriction enzyme linkers.
